# Supplementary material for: Impact of band-gap graded structures artificially implemented in Mg–ZnO epitaxial films on photoelectrochemical properties
Source: Royal Society of Chemistry journal article supplement (doi:10.1039/d2cy01178f), 2022-01-01
Supplement: d2cy01178f1.pdf [file d2cy01178f1.pdf]

## Electronic Supplementary Information (ESI)

# Impact of Band-gap Graded Structures Artificially Implemented in Mg-ZnO Epitaxial Films on Photoelectrochemical Properties

*Yuta Sato*<sup>a</sup>, *Kenichi Kaminaga*<sup>a</sup>, *Ryota Takahashi*<sup>b</sup>, *Shingo Maruyama*<sup>a</sup>, and *Yuji Matsumoto*<sup>a\*</sup>

<sup>a</sup> Department of Applied Chemistry, School of Engineering, Tohoku University, Sendai 980-8579, Japan

<sup>b</sup> Department of Electrical and Electronic Engineering, College of Engineering, Nihon University, 1 Nakagawara, Tokusada, Tamuramachi, Koriyama, Fukushima, 963-8642, Japan

|           | Sample Mg-0 | Sample Mg-3 | Sample Mg-5 | Sample Mg-8 | Sample Mg-10 |
|-----------|-------------|-------------|-------------|-------------|--------------|
| Mg by WDS | 0           | –           | 10.5        | 15.3        | 18.0         |

**Table S1 Mg composition estimated by WDS**

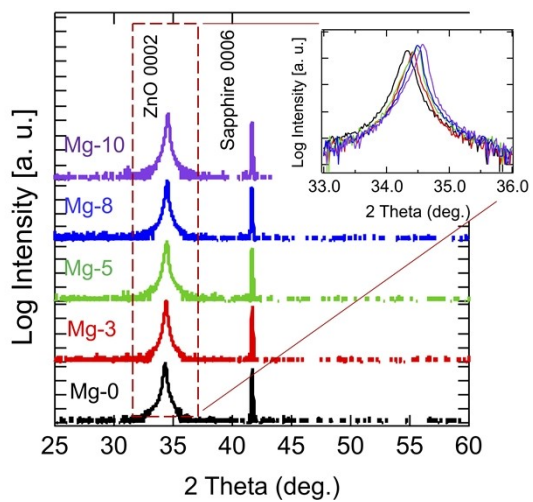

**Figure S1** XRD patterns of Mg-doped ZnO films with different nominal Mg compositions of 0 to 10 at%.

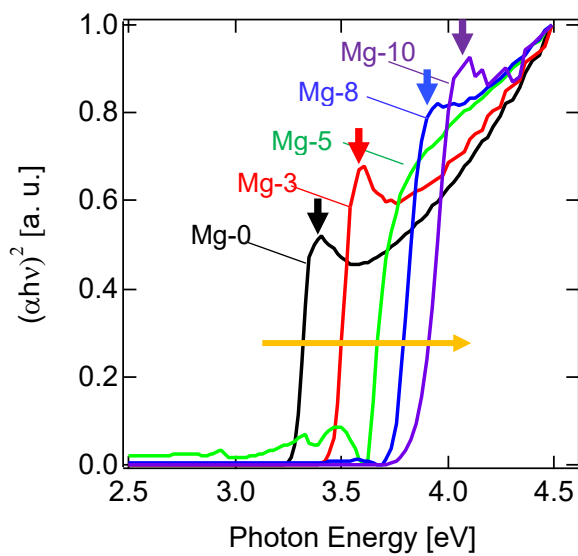

**Figure S2** Tauc plots from the optical absorption spectra of Mg-doped ZnO films with different nominal Mg compositions of 0 to 10 at%. The arrows indicate the peak positions assigned to an excitonic absorption.

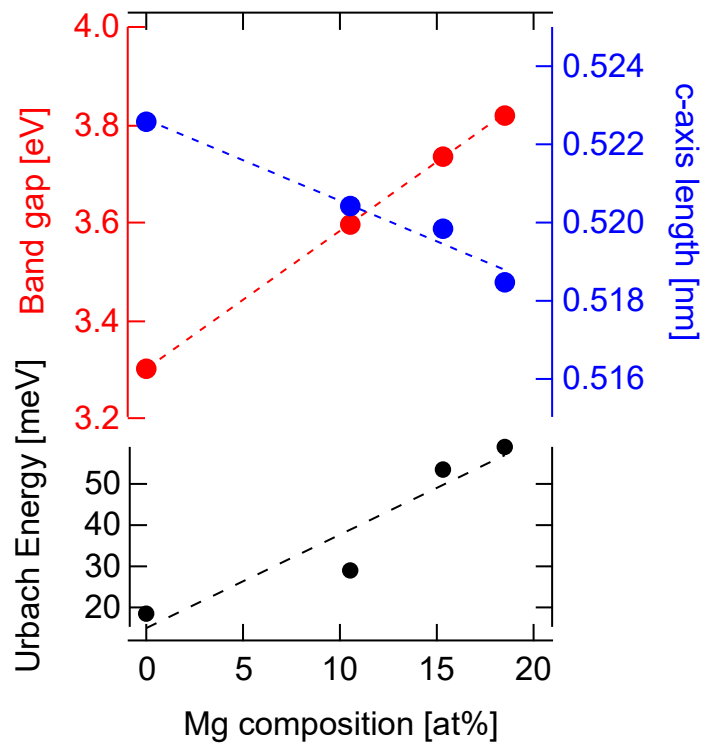

**Figure S3** Linear relationships of the band gap, the *c*-axis length and the Urbach energy to the Mg composition. Here, it should be noted that the data points for Sample Mg-3 were missing in the plots due to no WDS data of its Mg composition as listed in Table S1.

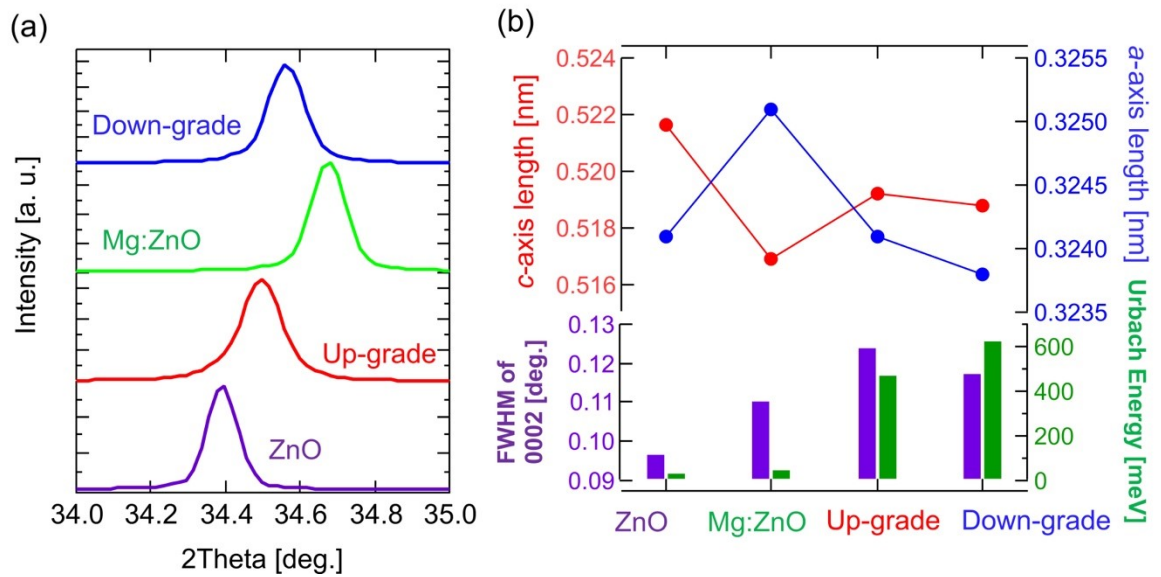

**Figure S4** For ZnO, Mg:ZnO, up-grade and down-grade Mg-ZnO films, (a) XRD patterns in linear scale intensity, (b) Plots of the *a*- and *c*-axis parameters, the FWHM values of the 0002 peak in the  $\theta$ - $2\theta$  scan, and the Urbach energy values.
